# Supplementary figures and images for: Chemical micromotors self-assemble and self-propel by spontaneous symmetry breaking
Source: Royal Society of Chemistry journal article supplement (doi:10.1039/c8cc06467a), 2018-01-01

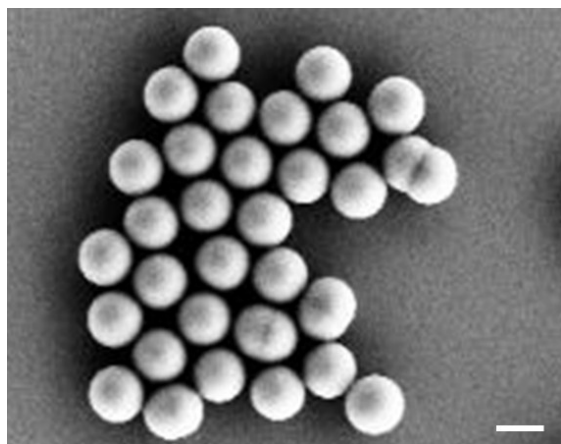

Figure S1\_top

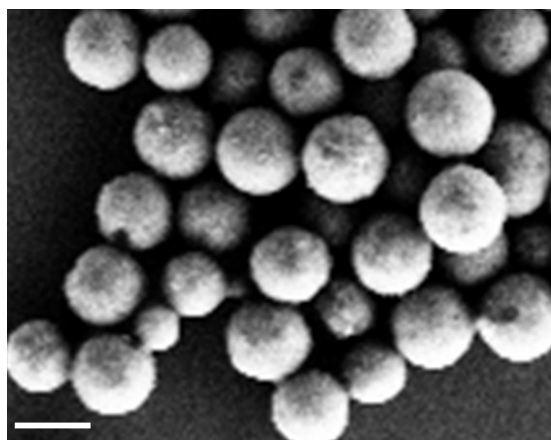

Figure S1\_bottom

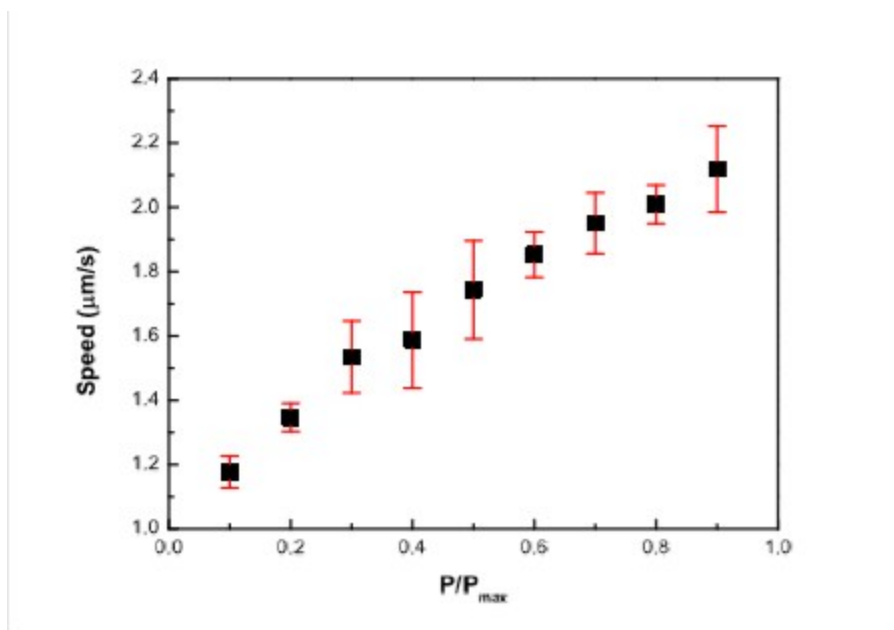

Figure S2

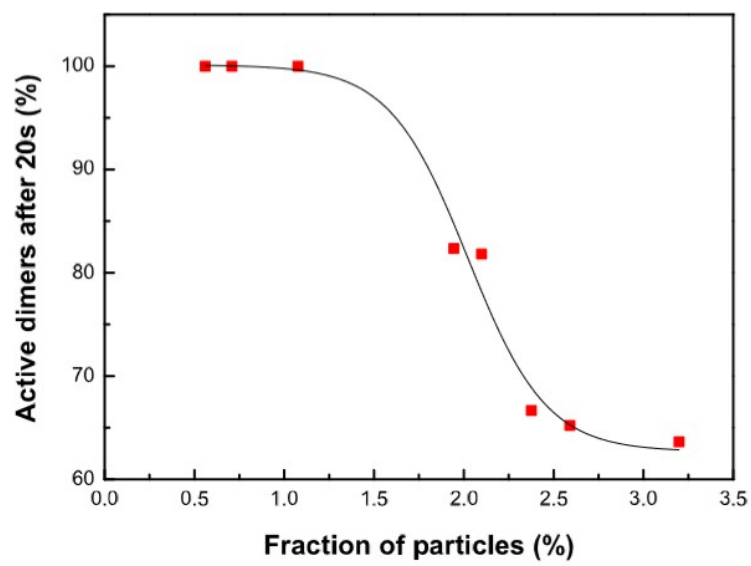

Figure S3

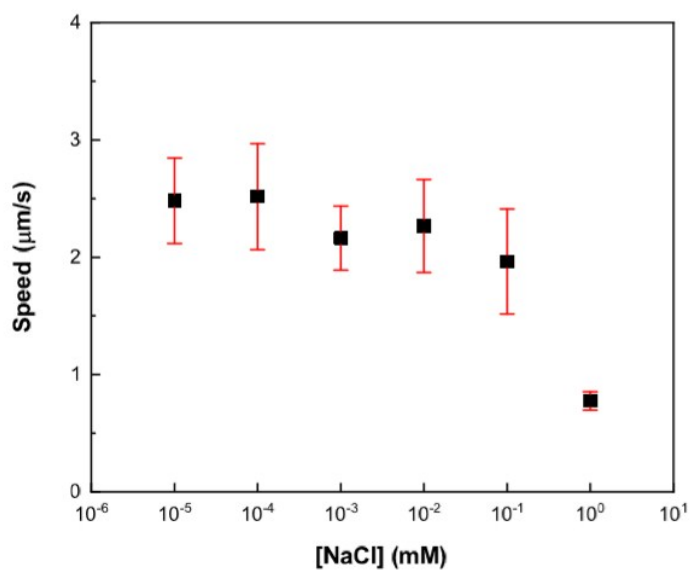

Figure S4

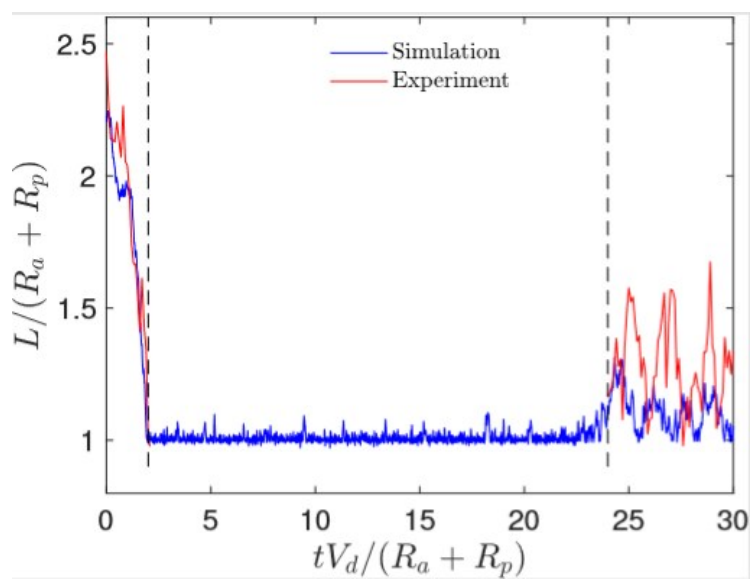

Figure S5

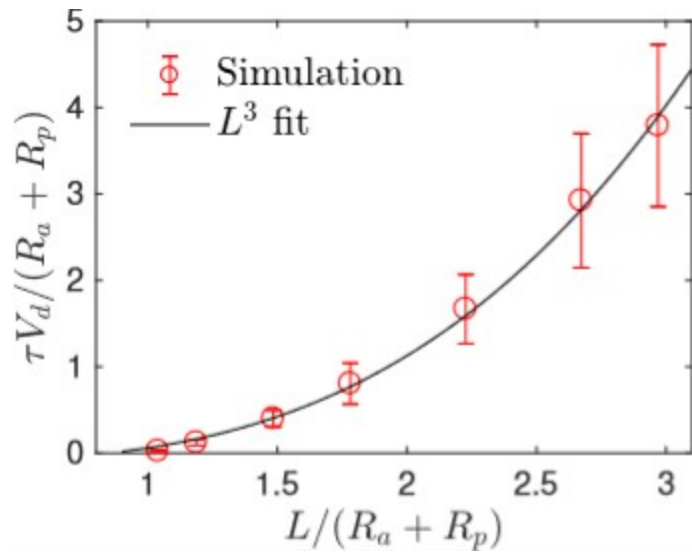

Figure S6

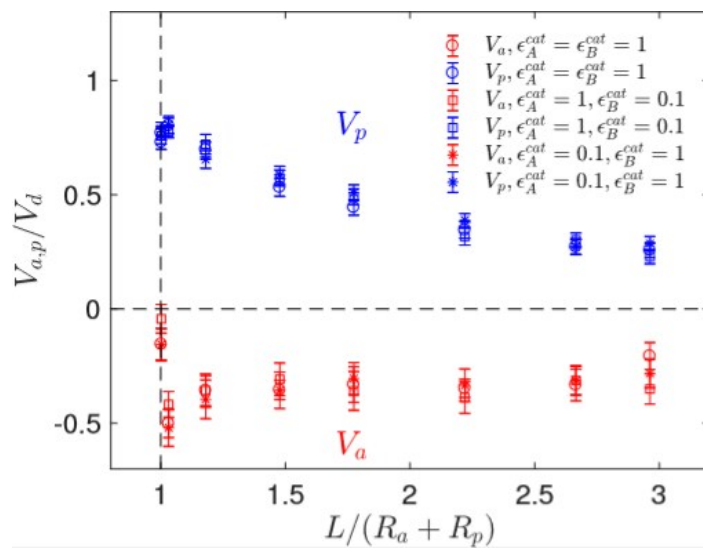

Figure S7

Supplement: c8cc06467a1.pdf [file c8cc06467a1.pdf]
